# Supplementary material
Source: MDPI journal article supplement (https://www.mdpi.com/1999-4907/11/2/233)

Figure S1: Genetic diversity parameters for the 25 populations. Bars indicate the 95% confidence intervals.

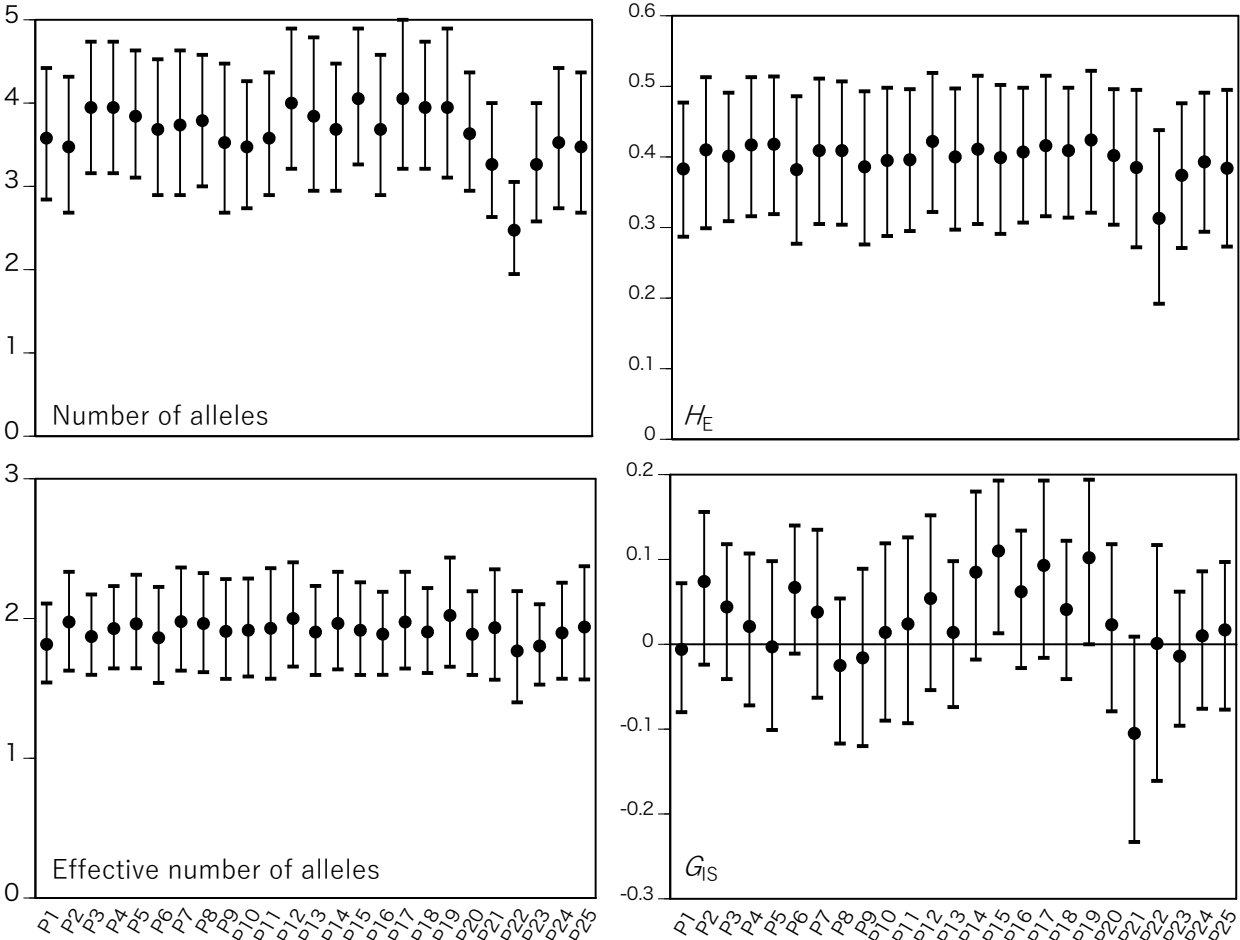

Supplement: s1 [file s1]
