# Supplementary material
Source: MDPI journal article supplement (https://www.mdpi.com/1999-4907/11/2/233)

Figure S2: Relationships among number of alleles and longitude east. Lines indicate the least squares.

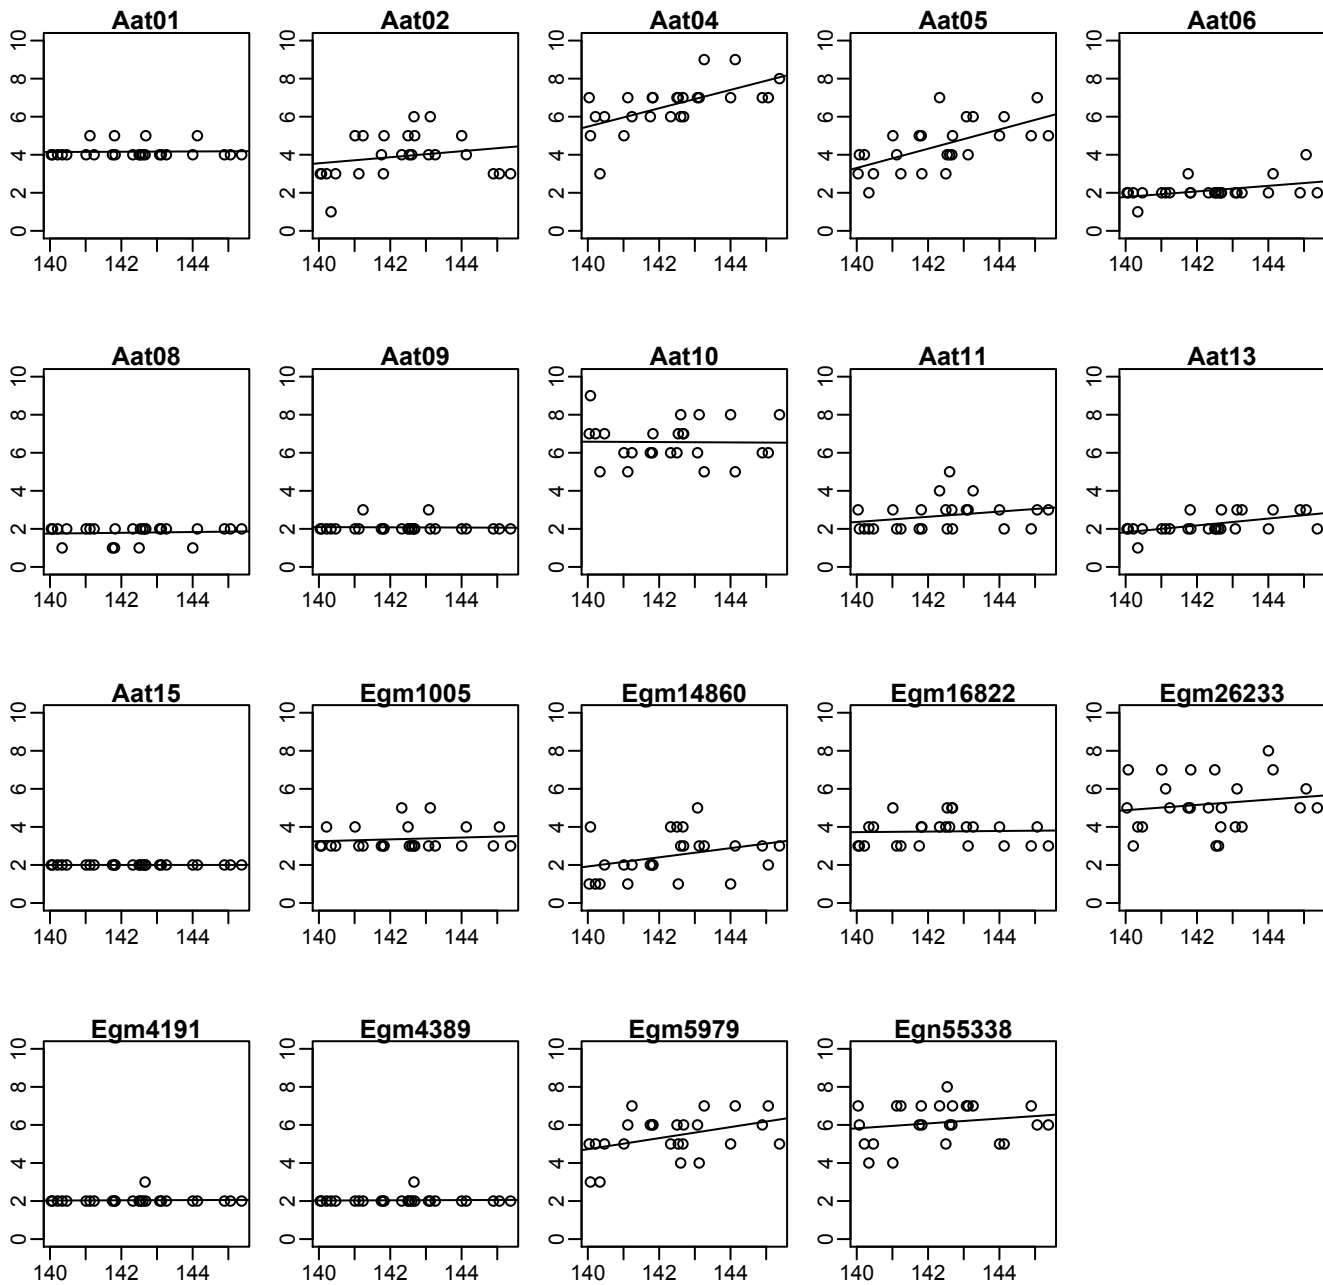

Supplement: s1 [file s1]
