# Supplementary material
Source: MDPI journal article supplement (https://www.mdpi.com/1999-4907/11/2/233)

Figure S5: Relationships among  $G_{\text{IS}}$  and longitude east. Lines indicate the least squares.

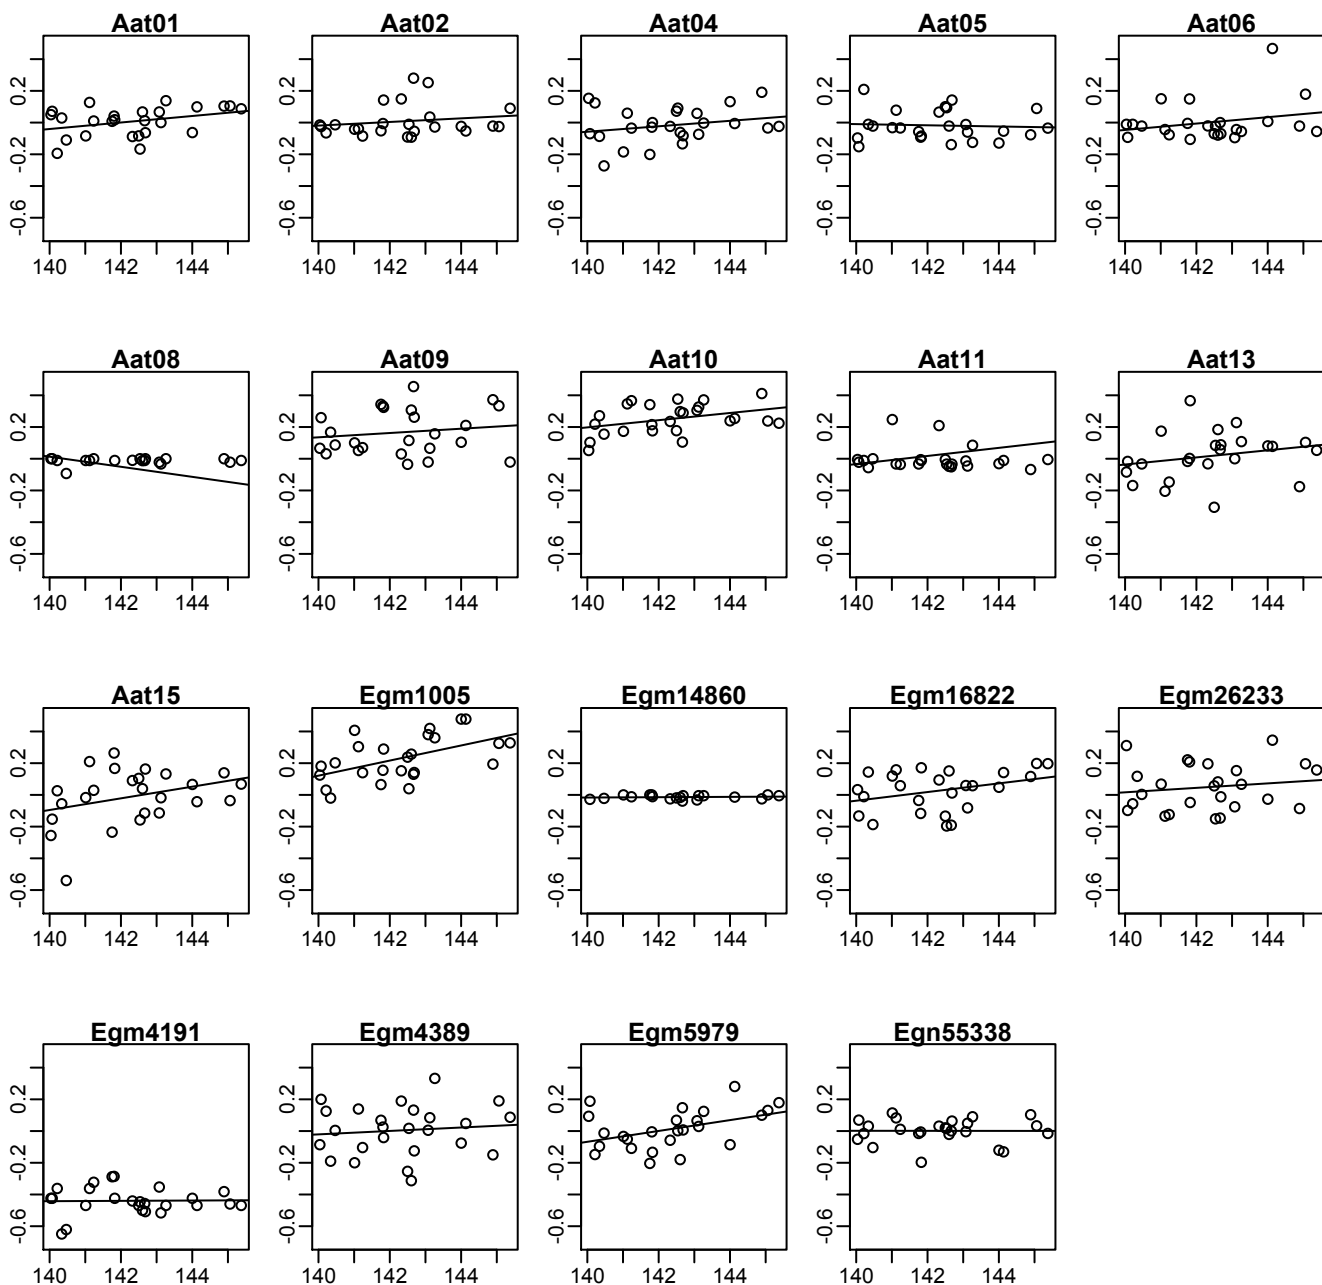

Supplement: s1 [file s1]

Figure S6: STRUCTURE results from K= 2 to 4. Populations are arranged from SW (left) to NE (right).

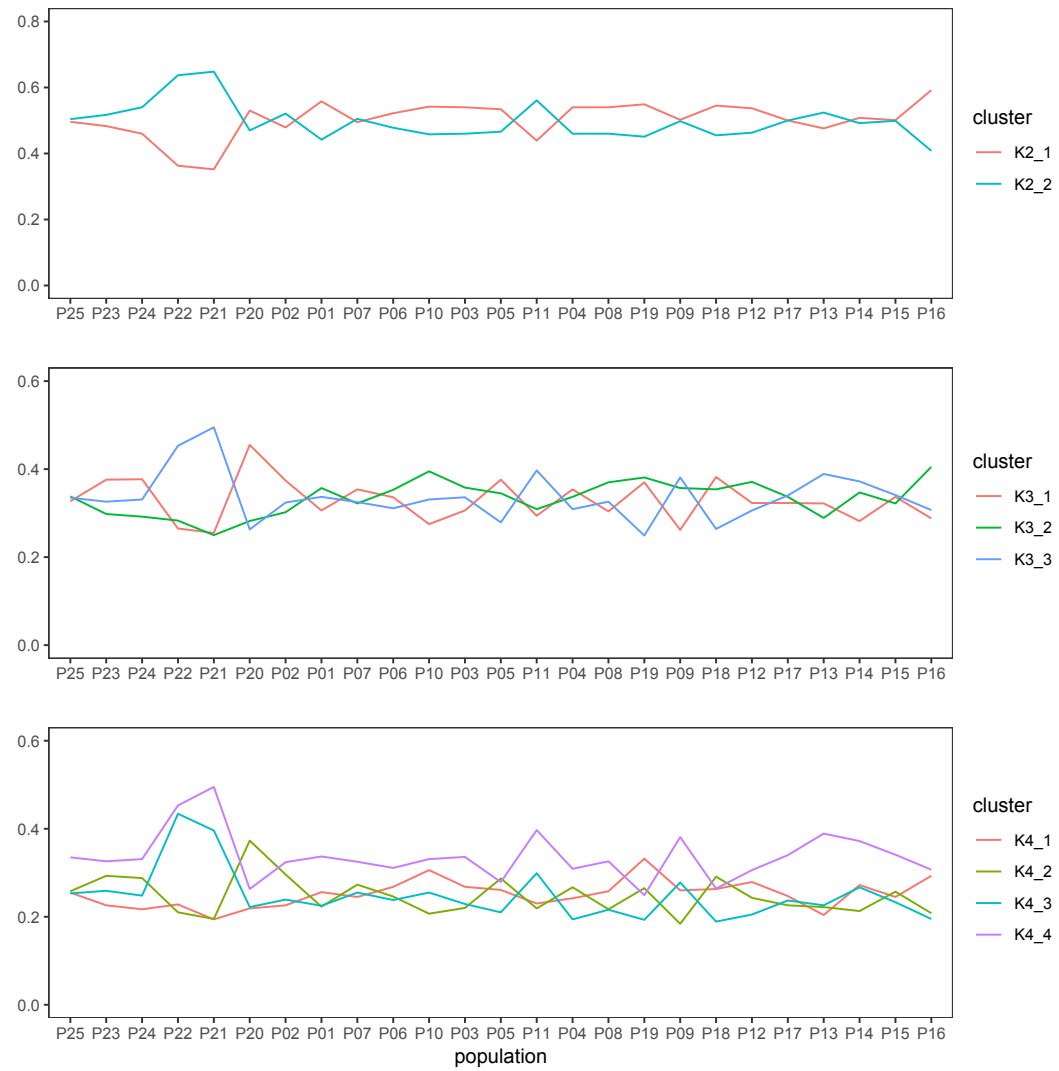

Supplement: s1 [file s1]

Figure S4: Relationships among  $H_E$  and longitude east. Lines indicate the least squares.

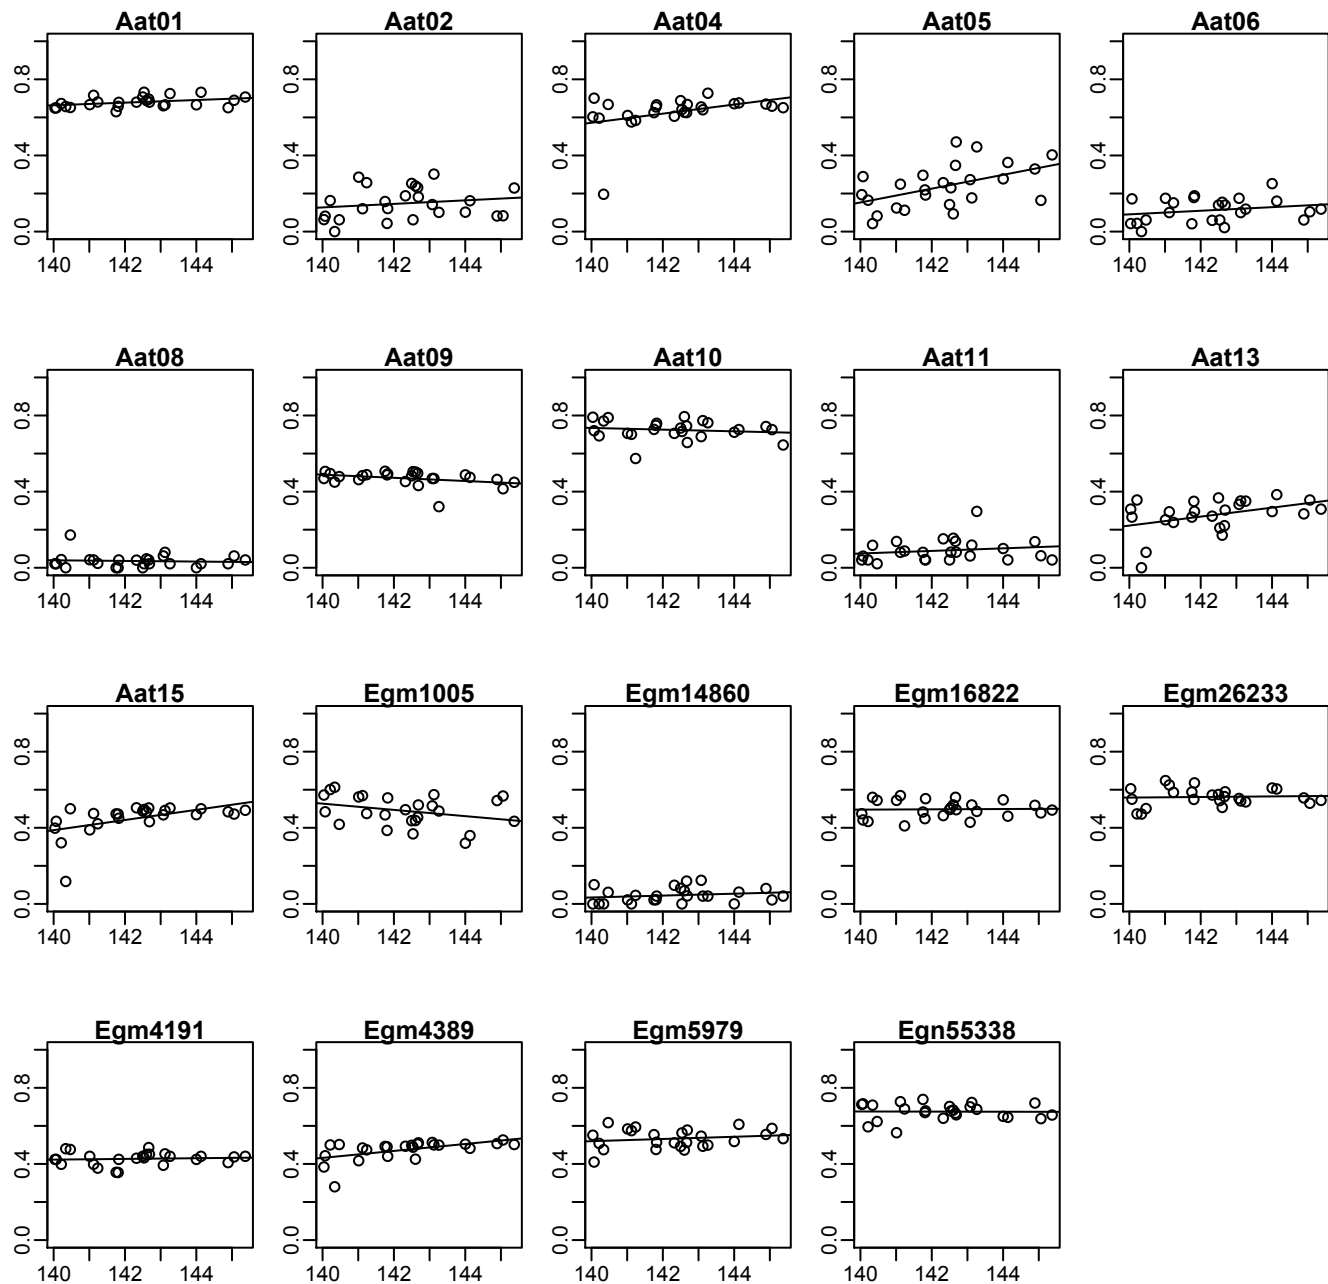

Supplement: s1 [file s1]
